# Supplementary material for: Slow magnetic relaxation and water oxidation activity of dinuclear CoIICoIII and unique triangular CoIICoIICoIII mixed-valence complexes
Source: Royal Society of Chemistry journal article supplement (doi:10.1039/d0dt00036a), 2020-01-01
Supplement: d0dt00036a1.pdf [file d0dt00036a1.pdf]

## Electronic Supplementary Information(ESI)

### **Slow magnetic relaxation and water oxidation activity of dinuclear Co<sup>II</sup>Co<sup>III</sup> and unique triangular Co<sup>II</sup>Co<sup>II</sup>Co<sup>III</sup> mixed-valence complexes**

Ritwik Modak,<sup>a</sup> Biswajit Mondal,<sup>b</sup> Yeasin Sikdar,<sup>a</sup> Jayisha Banerjee,<sup>a</sup> Enrique Colacio,<sup>\*c</sup> Itziar Oyarzábal,<sup>d</sup> Joan Cano,<sup>\*e</sup> and Sanchita Goswami<sup>\*a</sup>

<sup>a</sup> Department of Chemistry, University of Calcutta, 92, A. P. C. Road, Kolkata – 700009, India.

<sup>b</sup> Department of Chemistry, University of Wisconsin-Madison, Madison, Wisconsin – 53706, United States.

<sup>c</sup> Department of Inorganic Chemistry, Faculty of Sciences, University of Granada, 18071-Granada, Spain.

<sup>d</sup> Departamento de Química Aplicada, Facultad de Química, UPV/EHU, Paseo Manuel Lardizabal, nº 3, 20018, Donostia-San Sebastián, Spain.

<sup>e</sup> Fundació General de la Universitat de València (FGUV), Universitat de València, 46980 Paterna, València, Spain.

\* Email: [sgchem@caluniv.ac.in](mailto:sgchem@caluniv.ac.in) (S.G.).

\* Email: [ecolacio@ugr.es](mailto:ecolacio@ugr.es) (E.C.).

\* Email: [joan.cano@uv.es](mailto:joan.cano@uv.es) (J.C.).

## Table of Contents

|                                                                                                                                                                                                                                                                                                                                                                                                      | Page No. |
|------------------------------------------------------------------------------------------------------------------------------------------------------------------------------------------------------------------------------------------------------------------------------------------------------------------------------------------------------------------------------------------------------|----------|
| <b>Table S1</b> Results of Continuous Shape Measurement Analysis for the Co(II) & Co(III) coordination Spheres <sup>a</sup> of complex <b>1</b> .                                                                                                                                                                                                                                                    | S3       |
| <b>Table S2</b> Results of Continuous Shape Measurement Analysis for the Co(II) and Co(III) coordination Spheres <sup>a</sup> of complex <b>2</b> .                                                                                                                                                                                                                                                  | S3       |
| <b>Table S3</b> BVS Calculation data for cobalt centers in complex <b>1</b> and <b>2</b> . <sup>a</sup>                                                                                                                                                                                                                                                                                              | S5       |
| <b>Fig. S11D</b> -chain structure formed with intermolecular hydrogen bonds (above).<br>Topology of chloro mediated water ribbon (below).                                                                                                                                                                                                                                                            | S5       |
| <b>Table S4</b> A selection of calculated parameters that defines the <i>zfs</i> tensor ( <i>D</i> and <i>E/D</i> ratio), spin-spin ( <i>D<sub>SS</sub></i> ) and spin-orbit ( <i>D<sub>SO</sub></i> ) contribution to the axial component of <i>zfs</i> in <b>1</b> and <b>2</b> . Calculations were carried out on the wavefunction provided by the CASSCF method (see into Experimental Section). | S6       |
| <b>Fig. S2</b> Cole-Cole plots for temperatures between 2.4–4 K (above) and 4.2–5.2 K (below) of Complex <b>1</b> .                                                                                                                                                                                                                                                                                  | S6       |

- Fig. S3** Frequency dependence of the out-of-phase signal ( $\chi''_M$ ) in the 4.2 K-5.2 K temperature range of **1**. The solids lines correspond to the best-fitting to the Debye model. S7
- Fig. S4** Cyclic voltammetry of the 0.5 mM of the complex at *pH* 7 phosphate buffer. ITO is used as working electrode, Ag/AgCl as reference electrode and Pt as counter electrode. The potential is adjusted to NHE. S8
- Fig S5** The plot of catalytic peak current at *pH* 7 with respect to catalyst concentration. S8
- Fig. S6** Absorption spectra of the complex **1** as a function of pH. S9
- Fig. S7** Cyclic voltammetry of the 0.5 mM of the complex **1** at *pH* 11 phosphate buffer. Inset: The initial cathodic scan under anaerobic conditions is marked in green arrow showing no trace of oxygen reduction. Glassy carbon electrode (GCE) is used as working electrode, Ag/AgCl as reference electrode and Pt as counter electrode. The potential is adjusted to NHE. S9
- Fig. S8** The charge vs time plot of the 0.5 mM of the catalyst at *pH*7 phosphate buffer. Constant electrode potential = 1.4 V vs NHE. ITO is used as working electrode, Ag/AgCl as reference electrode and Pt as counter electrode. S10
- Fig. S9** The absorption spectra of the complex before and after bulk electrolysis (1.4 V vs NHE) at *pH*7 phosphate buffer. S10

**Shape analysis** :Continuous Shape Measurement (CShM)<sup>a</sup> of Co<sup>II</sup> and Co<sup>III</sup> coordination sphere using SHAPE v2.1.

**Table S1** Results of Continuous Shape Measurement Analysis for the Co(II) & Co(III) coordination Spheres<sup>a</sup> of complex **1**.

-----  
 S H A P E v2.1 Continuous Shape Measures calculation  
 (c) 2013 Electronic Structure Group, Universitat de Barcelona  
 Contact: llunell@ub.edu  
 -----

CoL6 structures

HP-6 1 D6h Hexagon  
 PPY-6 2 C5v Pentagonal pyramid  
 OC-6 3 Oh Octahedron  
 TPR-6 4 D3h Trigonal prism  
 JPPY-6 5 C5v Johnson pentagonal pyramid J2

Structure [ML6 ] **HP-6** **PPY-6** **OC-6** **TPR-6** **JPPY-6**

Co1(III) center , 31.236, 28.474, 0.205, 15.492, 32.094

-----  
 Co2(II) center, 25.782, 14.801, 4.130, 8.281, 18.272

**Table S2** Results of Continuous Shape Measurement Analysis for the Co(II) and Co(III) coordination Spheres<sup>a</sup> of complex **2**.

***Analysis of Co1(III) center:***

-----  
 S H A P E v2.1 Continuous Shape Measures calculation  
 (c) 2013 Electronic Structure Group, Universitat de Barcelona  
 Contact: llunell@ub.edu  
 -----

CoL6 structures

HP-6 1 D6h Hexagon  
 PPY-6 2 C5v Pentagonal pyramid  
 OC-6 3 Oh Octahedron  
 TPR-6 4 D3h Trigonal prism

JPPY-6      5 C5v   Johnson pentagonal pyramid J2

Structure [ML6 ]**HP-6**    **PPY-6**    **OC-6**    **TPR-6**    **JPPY-6**  
Co1(III) center,    31.912,    28.856,    0.233,    15.662,    32.514

***Analysis of Co2(II) center:***

-----  
S H A P E v2.1      Continuous Shape Measures calculation  
(c) 2013 Electronic Structure Group, Universitat de Barcelona  
Contact: llunell@ub.edu  
-----

CoL6 structures

HP-6      1 D6h   Hexagon  
PPY-6      2 C5v   Pentagonal pyramid  
OC-6      3 Oh    Octahedron  
TPR-6      4 D3h   Trigonal prism  
JPPY-6      5 C5v   Johnson pentagonal pyramid J2

Structure [ML6 ]**HP-6**    **PPY-6**    **OC-6**    **TPR-6**    **JPPY-6**  
Co2(II) center ,    34.485,    23.582,    2.114,    12.639,    28.317

CoL5 structures

PP-5      1 D5h   Pentagon  
vOC-5      2 C4v   Vacant octahedron  
TBPY-5      3 D3h   Trigonalbipyramid  
SPY-5      4 C4v   Spherical square pyramid  
JTBPY-5      5 D3h   Johnson trigonalbipyramid J12

Structure [ML5 ]**PP-5**    **vOC-5**    **TBPY-5**    **SPY-5**    **JTBPY-5**  
Co2(II) center ,    25.914,    1.102,    7.407,    2.015,    8.917

***Analysis of Co3(II) center:***

-----  
S H A P E v2.1      Continuous Shape Measures calculation  
(c) 2013 Electronic Structure Group, Universitat de Barcelona  
Contact: llunell@ub.edu  
-----

CoL5 structures

PP-5      1 D5h   Pentagon  
vOC-5      2 C4v   Vacant octahedron  
TBPY-5      3 D3h   Trigonalbipyramid  
SPY-5      4 C4v   Spherical square pyramid  
JTBPY-5      5 D3h   Johnson trigonalbipyramid J12

Structure [ML5 ]PP-5    vOC-5    TBPY-5    SPY-5    JTBPY-5  
 Co3(II) Center ,    32.034,    5.771,    1.418,    4.063,    4.091

**Table S3** BVS Calculation data for cobalt centers in complex **1** and **2**.<sup>a</sup>

|       | Complex 1                     |                              | Complex 2 |                               |                              |
|-------|-------------------------------|------------------------------|-----------|-------------------------------|------------------------------|
|       | $R_0(\text{Co}^{\text{III}})$ | $R_0(\text{Co}^{\text{II}})$ |           | $R_0(\text{Co}^{\text{III}})$ | $R_0(\text{Co}^{\text{II}})$ |
| Co(1) | <u>3.198</u>                  | 3.258                        | Co(1)     | <u>3.263</u>                  | 3.220                        |
| Co(2) | 1.672                         | <u>1.904</u>                 | Co(2)     | 1.985                         | <u>2.071</u>                 |
|       |                               |                              | Co(3)     | 1.872                         | <u>1.889</u>                 |

<sup>a</sup>The underlined value is the closest to the charge for which it was calculated.

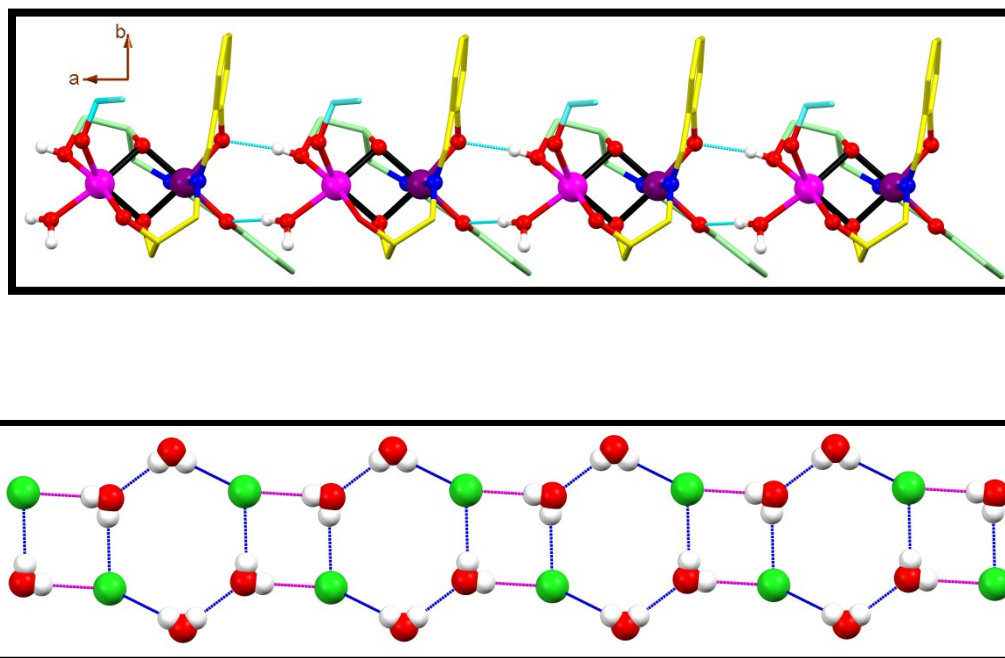

**Fig. S1** 1D-chain structure formed with intermolecular hydrogen bonds (above). Topology of chloro mediated water ribbon (below).

**Table S4** A selection of calculated parameters that defines the *zfs* tensor (*D* and *E/D* ratio), spin-spin (*D<sub>SS</sub>*) and spin-orbit (*D<sub>SO</sub>*) contribution to the axial component of *zfs* in **1** and **2**. Calculations were carried out on the wavefunction provided by the CASSCF method (see into Experimental Section).

| Compound                                       | <i>D</i> <sup>a</sup> | <i>D<sub>SS</sub></i> <sup>a</sup> | <i>D<sub>SO</sub></i> <sup>a</sup> | <i>E/D</i> | <i>S<sub>eff</sub></i> = 1/2 <sup>b</sup> |                       |                       |
|------------------------------------------------|-----------------------|------------------------------------|------------------------------------|------------|-------------------------------------------|-----------------------|-----------------------|
|                                                |                       |                                    |                                    |            | <i>g</i> <sub>1</sub>                     | <i>g</i> <sub>2</sub> | <i>g</i> <sub>3</sub> |
| <b>1</b> [Co <sup>II</sup> Co <sup>III</sup> ] | +44.0                 | +0.6                               | +43.9                              | 0.185      | 2.028                                     | 3.842                 | 6.245                 |
| <b>1</b> [Co <sup>II</sup> Ga <sup>III</sup> ] | +43.3                 | +0.6                               | +43.2                              | 0.188      | 2.027                                     | 3.835                 | 6.240                 |
| <b>2</b> [Co <sub>2</sub> ]                    | +63.1                 | -0.6                               | +63.4                              | 0.208      | 2.183                                     | 4.230                 | 6.130                 |
| <b>2</b> [Co <sub>3</sub> ]                    | -23.2                 | +0.5                               | -23.0                              | 0.084      | 7.567                                     | 0.647                 | 0.600                 |

<sup>c</sup> in cm<sup>-1</sup>. <sup>b</sup> The directions of the components of the Landé factor (*g<sub>i</sub>*) are not assigned directly in the theoretical calculation, but the positive value of *D* and the magnitude of the components allows concluding that *g<sub>x</sub>* = *g<sub>2</sub>*, *g<sub>y</sub>* = *g<sub>3</sub>* and *g<sub>z</sub>* = *g<sub>1</sub>*.

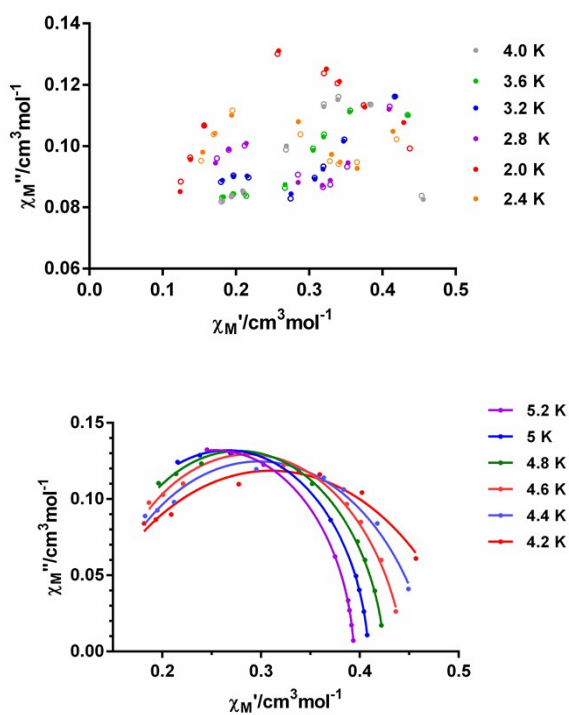

**Fig. S2** Cole-Cole plots for temperatures between 2.4–4 K (above) and 4.2–5.2 K (below) of Complex **1**.

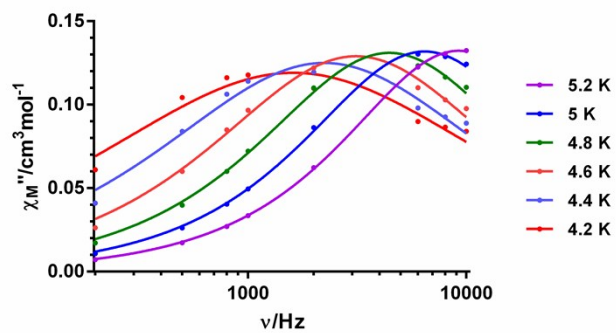

**Fig. S3** Frequency dependence of the out-of-phase signal ( $\chi''_M$ ) in the 4.2 K-5.2 K temperature range of **1**. The solid lines correspond to the best-fitting to the Debye model.

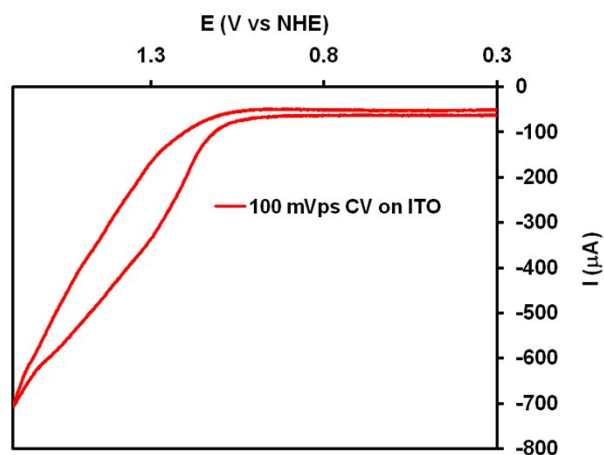

**Fig. S4** Cyclic voltammetry of the 0.5 mM of the complex at *pH* 7 phosphate buffer. ITO is used as working electrode, Ag/AgCl as reference electrode and Pt as counter electrode. The potential is adjusted to NHE.

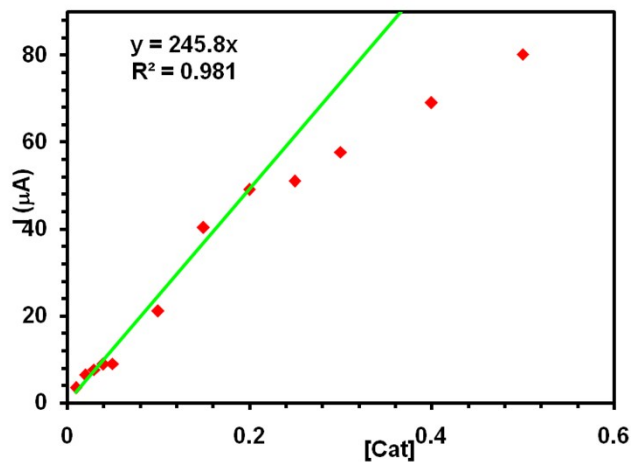

**Fig. S5** The plot of catalytic peak current at *pH* 7 with respect to catalyst concentration.



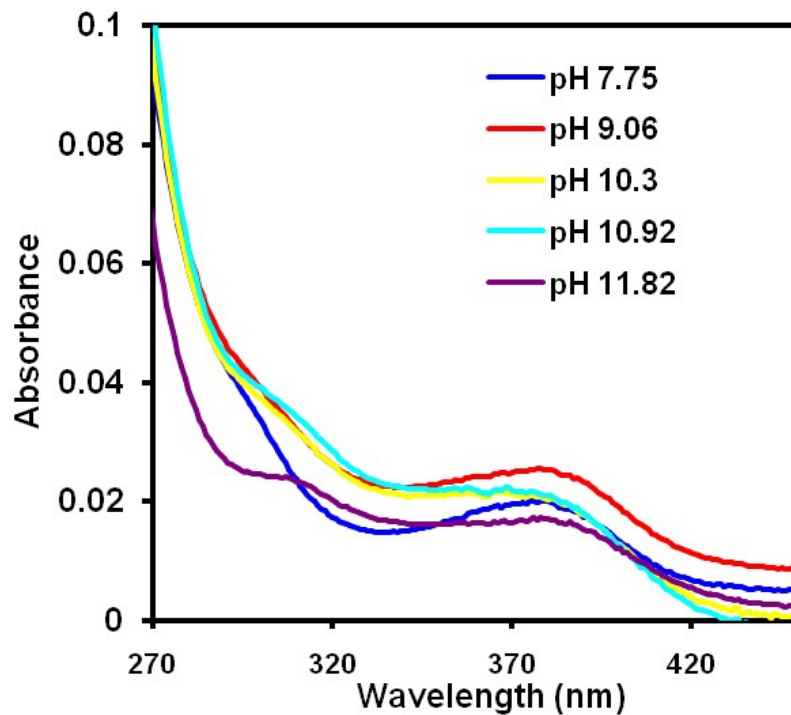

**Fig. S6** Absorption spectra of the complex **1** as a function of pH.

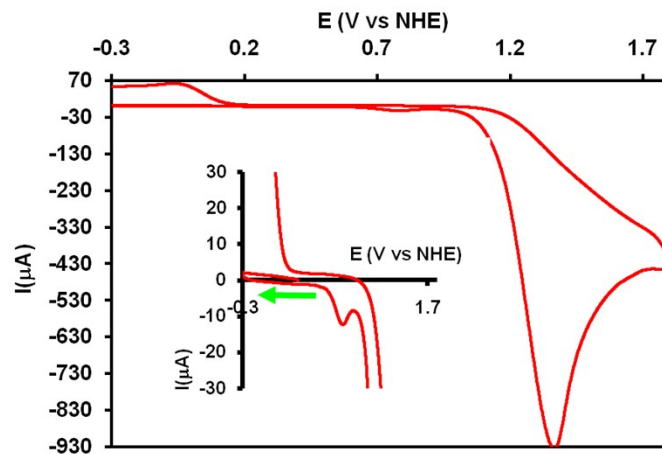

**Fig. S7** Cyclic voltammetry of the 0.5 mM of the complex **1** at *pH* 11 phosphate buffer. Inset: The initial cathodic scan under anaerobic conditions is marked in green arrow showing no trace of oxygen reduction. Glassy carbon electrode (GCE) is used as working electrode, Ag/AgCl as reference electrode and Pt as counter electrode. The potential is adjusted to NHE.

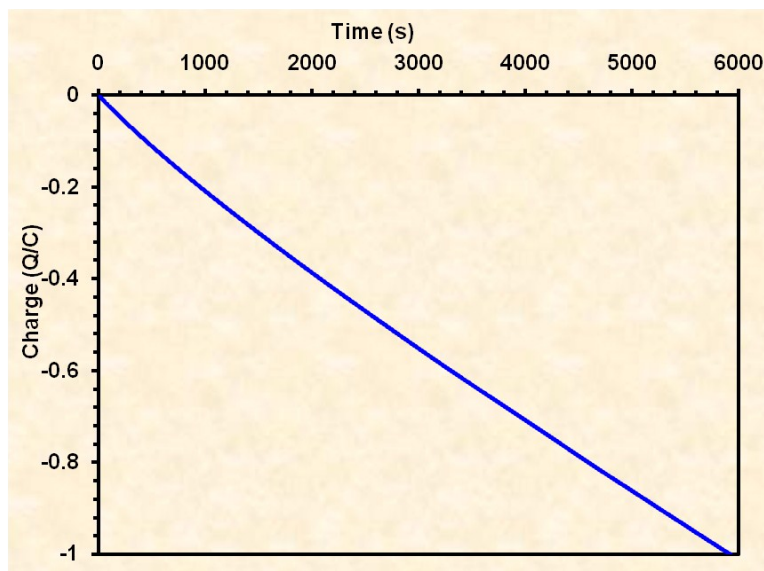

**Fig. S8** The charge vs time plot of the 0.5 mM of the catalyst at *pH*7 phosphate buffer. Constant electrode potential = 1.4 V vs NHE. ITO is used as working electrode, Ag/AgCl as reference electrode and Pt as counter electrode.

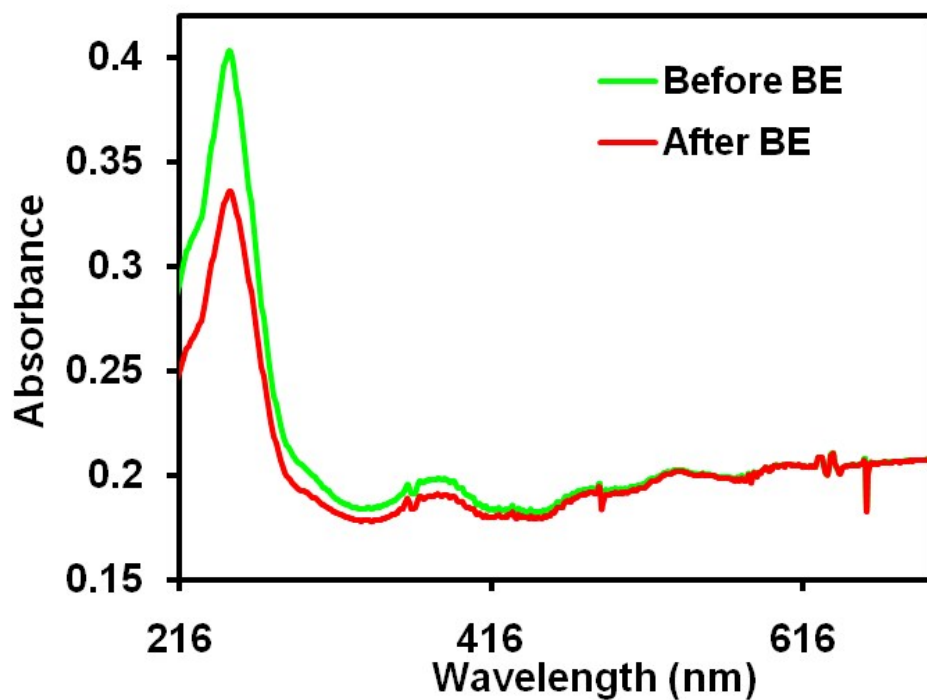

**Fig. S9** The absorption spectra of the complex before and after bulk electrolysis (1.4 V vs NHE) at *pH*7 phosphate buffer.
